# Supplementary material for: Li+ intercalation in isostructural Li2VO3 and Li2VO2F with O2− and mixed O2−/F− anions
Source: Royal Society of Chemistry journal article supplement (doi:10.1039/c5cp02505b), 2015-01-01
Supplement: c5cp02505b1.pdf [file c5cp02505b1.pdf]

Supporting Information

**Li<sup>+</sup> intercalation in isostructural Li<sub>2</sub>VO<sub>3</sub> and Li<sub>2</sub>VO<sub>2</sub>F with O<sup>2-</sup> and mixed O<sup>2-</sup>/F<sup>-</sup> anions**

Ruiyong Chen,\* Shuhua Ren, Murat Yavuz, Alexander A. Guda, Viktor Shapovalov,  
Raiker Witter, Maximilian Fichtner and Horst Hahn

\* E-Mail: ruiyong.chen@kit.edu; hc18chen@gmail.com

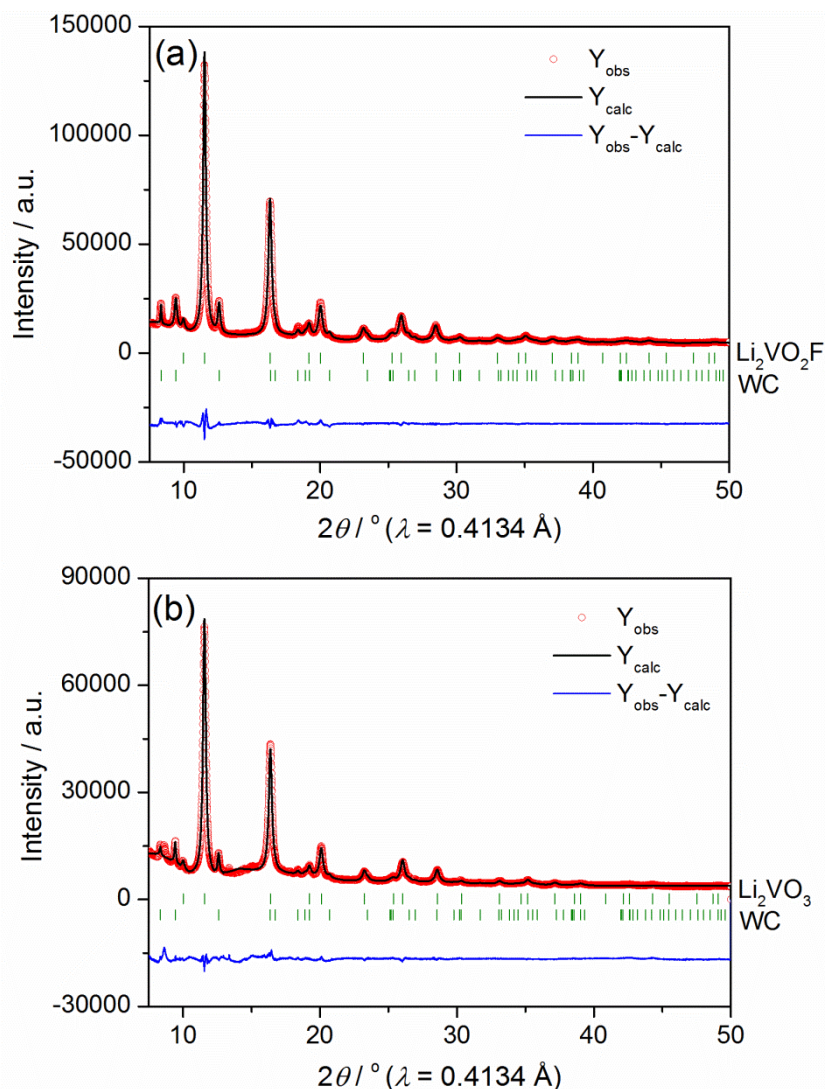

**Fig. S1** Synchrotron XRD patterns ( $\lambda = 0.4134 \text{ \AA}$ ) and Rietveld refinement ( $Fm-3m$  space group) for (a)  $\text{Li}_2\text{VO}_2\text{F}$ ,  $a = 4.1178 \text{ \AA}$ ,  $R_p = 7.83$ ,  $R_{wp} = 7.82$ ,  $R_e = 2.38$ ,  $B_{\text{iso}}(\text{O},\text{F}) = 1.186$ ,  $B_{\text{iso}}(\text{Li},\text{V}) = 0.467$ ; (b)  $\text{Li}_2\text{VO}_3$ ,  $a = 4.1044 \text{ \AA}$ ,  $R_p = 11.6$ ,  $R_{wp} = 10.8$ ,  $R_e = 3.08$ . The phase fractions for the  $Fm-3m$  phase are 99% for both materials.

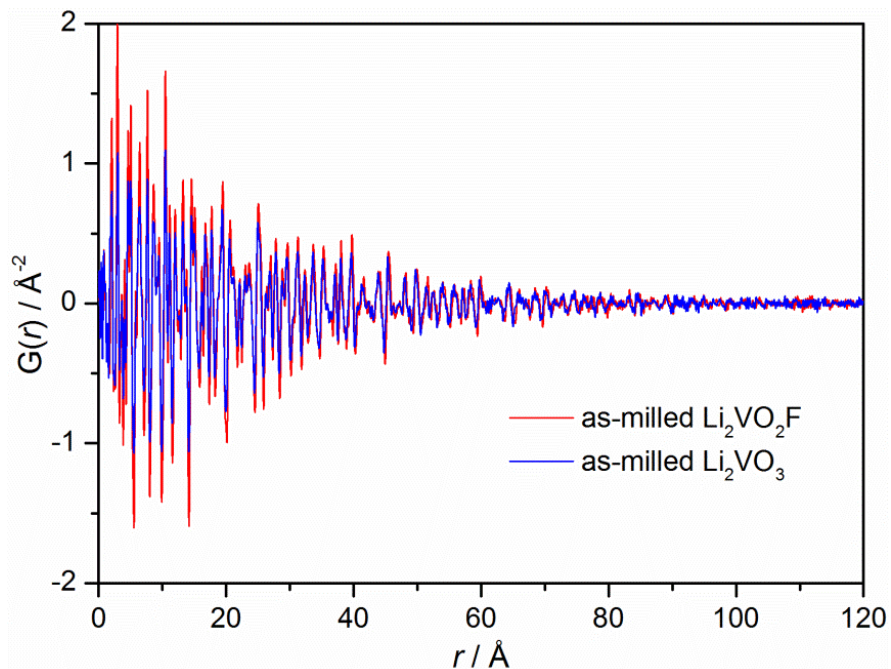

**Fig. S2** Experimental atomic PDF profiles,  $G(r)$ , for the as-milled  $\text{Li}_2\text{VO}_2\text{F}$  and  $\text{Li}_2\text{VO}_3$ . The primary crystallite sizes for both materials are about 10 nm.

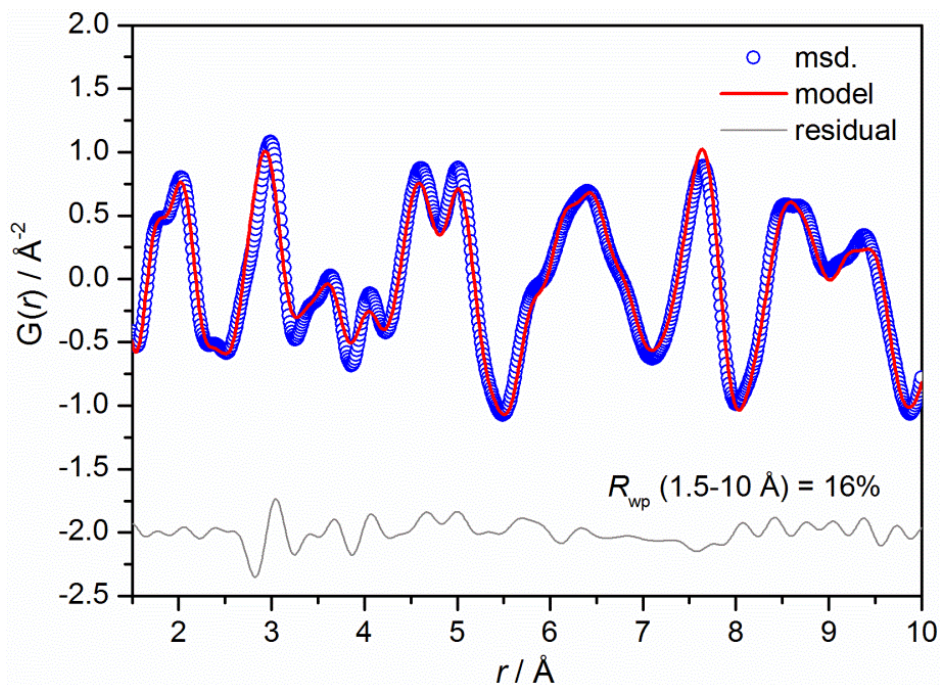

**Fig. S3** Experimental and calculated atomic PDF profile,  $G(r)$ , for the as-milled  $\text{Li}_2\text{VO}_3$ . The fitting was performed using a three-phase model:  $\text{Li}_2\text{VO}_3$  ( $Fm-3m$ ),  $\text{LiVO}_3$  ( $C2/c$ ) and WC. For the  $\text{Li}_2\text{VO}_3$   $Fm-3m$  phase,  $U_{\text{iso, Li}} = 0.091\text{\AA}^2$ ,  $U_{\text{iso, V}} = 0.010\text{\AA}^2$  and  $U_{\text{iso, O}} = 0.019\text{\AA}^2$ .

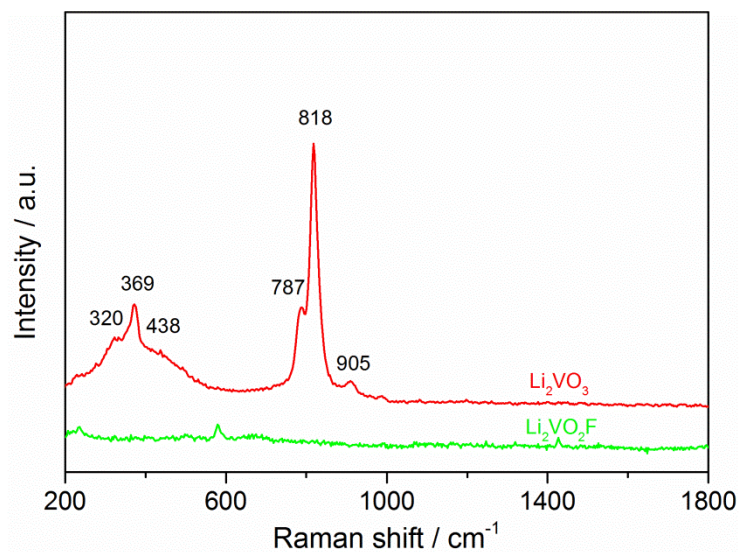

**Fig. S4** Raman spectra of the as-milled Li<sub>2</sub>VO<sub>2</sub>F and Li<sub>2</sub>VO<sub>3</sub>.

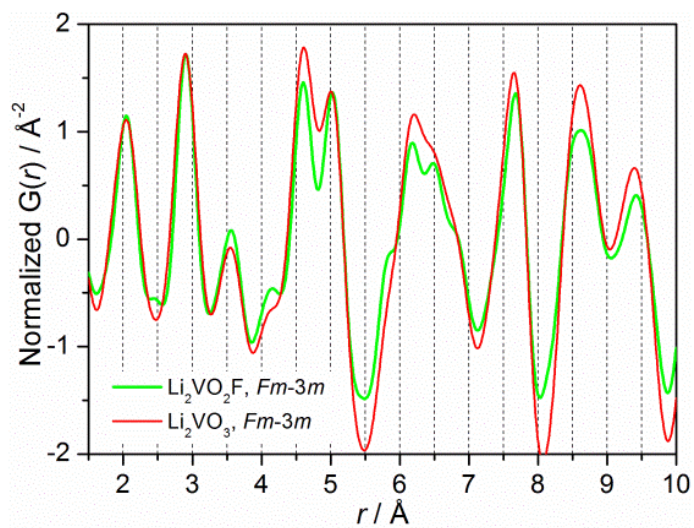

**Fig. S5** Modelled PDF profiles for the major *Fm-3m* phases of Li<sub>2</sub>VO<sub>2</sub>F and Li<sub>2</sub>VO<sub>3</sub> extracted from the multiple-phase PDF files.

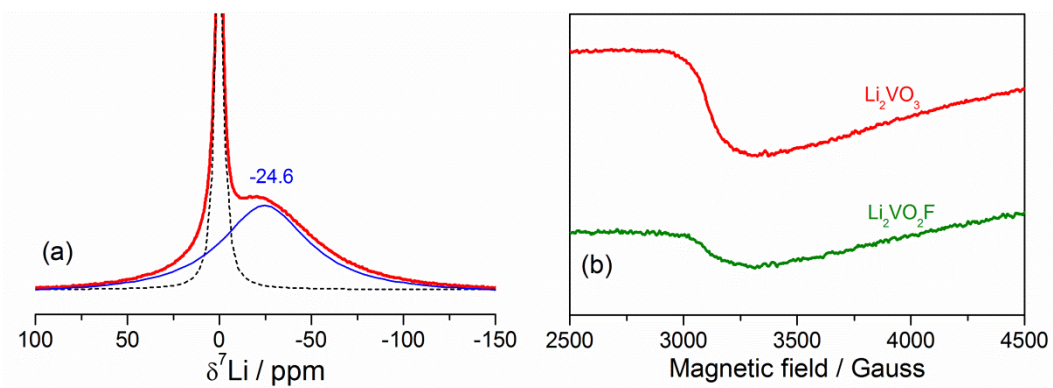

**Fig. S6** (a)  $^7\text{Li}$  MAS NMR for  $\text{Li}_2\text{VO}_3$ , (b) EPR spectra for  $\text{Li}_2\text{VO}_2\text{F}$  and  $\text{Li}_2\text{VO}_3$ .

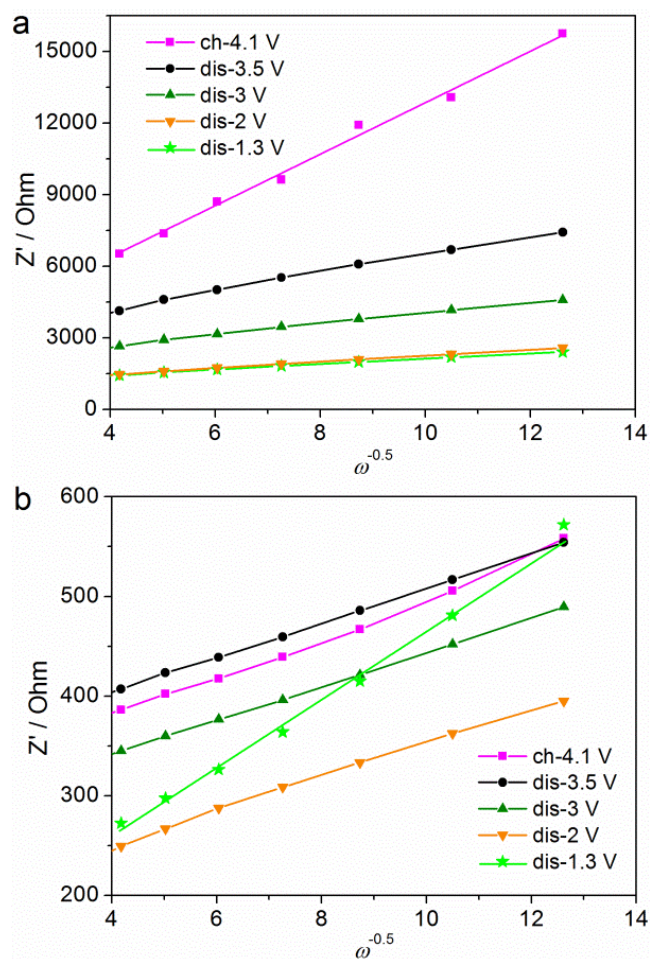

**Fig. S7** Real parts of the complex impedance versus  $\omega^{-1/2}$  at different voltages for (a)  $\text{Li}_2\text{VO}_3$  and (b)  $\text{Li}_2\text{VO}_2\text{F}$ .
